# Supplementary material for: Validation and cross-cultural adaptation of the Arabic version of the Pelvic Girdle Questionnaire
Source: Research Square preprint supplement (doi:10.21203/rs.3.rs-6263774/v1), 2025-04-22
Supplement: Supplementary file 1 [file 5d8b4dc3b1c3af8f69d696ef.pdf]

# Appendix 1: Pelvic girdle questionnaire (Arabic version)

الي اي مدي تجد صعوبة في القيام بالانشطة المذكورة بسبب الام حزام الحوض لديك؟ لكل نشاط ضع مؤشر علي افضل صندوق يصف حالك اليوم

| أجد صعوبة شديدة (٣)      | أجد صعوبة متوسطة (٢) | أجد صعوبة بسيطة (١) | لا أجد أي صعوبة (٠) | ما مدي الصعوبة التي تجدها بسبب الام حزام الحوض لديك في: |
|--------------------------|----------------------|---------------------|---------------------|---------------------------------------------------------|
|                          |                      |                     |                     | ١- ارتداء ملابسك                                        |
|                          |                      |                     |                     | ٢- الوقوف لاقل من عشر دقائق                             |
|                          |                      |                     |                     | ٣- الوقوف لأكثر من ستين دقيقة                           |
|                          |                      |                     |                     | ٤- الانحناء لأسفل                                       |
|                          |                      |                     |                     | ٥- الجلوس لاقل من عشر دقائق                             |
|                          |                      |                     |                     | ٦- الجلوس لأكثر من ستين دقيقة                           |
|                          |                      |                     |                     | ٧- المشي لاقل من عشر دقائق                              |
|                          |                      |                     |                     | ٨- المشي لأكثر من ستين دقيقة                            |
|                          |                      |                     |                     | ٩- صعود السلّم                                          |
|                          |                      |                     |                     | ١٠- القيام بالاعمال المنزلية                            |
|                          |                      |                     |                     | ١١- حمل الاشياء الخفيفة                                 |
|                          |                      |                     |                     | ١٢- حمل الاشياء الثقيلة                                 |
|                          |                      |                     |                     | ١٣- القيام/ الجلوس                                      |
|                          |                      |                     |                     | ١٤- دفع شيئاً ما بيدك                                   |
|                          |                      |                     |                     | ١٥- المشي سريعاً                                        |
| <input type="checkbox"/> |                      |                     |                     | ١٦- القيام بالانشطة الرياضية*                           |
|                          |                      |                     |                     | ١٧- الاستلقاء                                           |
|                          |                      |                     |                     | ١٨- التقلب في الفراش                                    |
| <input type="checkbox"/> |                      |                     |                     | ١٩- ممارسة الحياة الجنسية بطريقة طبيعية*                |
|                          |                      |                     |                     | ٢٠- دفع شيئاً ما بقدم واحدة                             |

\*إذا غير قابل للتطبيق، ضع مؤشر على الصندوق الي أقصى اليسار

| آلم شديد (٣) | آلم متوسط (٢) | آلم بسيط (١) | لا يوجد (٠)       | ما مدي الآلم الذي تشعر به :        |
|--------------|---------------|--------------|-------------------|------------------------------------|
|              |               |              |                   | ٢١- في الصباح                      |
|              |               |              |                   | ٢٢- في المساء                      |
| كثيراً (٣)   | بعض الوقت (٢) | قليلاً (١)   | لا يحدث أبداً (٠) | الي اي مدي، بسبب الام حزام الحوض : |
|              |               |              |                   | ٢٣- تعجز ساقك/ ساقك عن حملك        |
|              |               |              |                   | ٢٤- تقوم بالاشياء ببطء             |
|              |               |              |                   | ٢٥- نومك متقطع                     |

عملية الحساب: يتم جمع النقاط ثم تحول الي نسبة مئوية من ٠ (لا صعوبة على الإطلاق) الي ١٠٠ (صعوبة شديدة)
